# Supplementary material for: Osteopathic Treatment and Evaluation in the Clinical Setting of Childhood Hematological Malignancies
Source: MDPI journal article supplement (doi:10.3390/cancers13246321), 2021-12-16
Supplement: s1 [file s1]

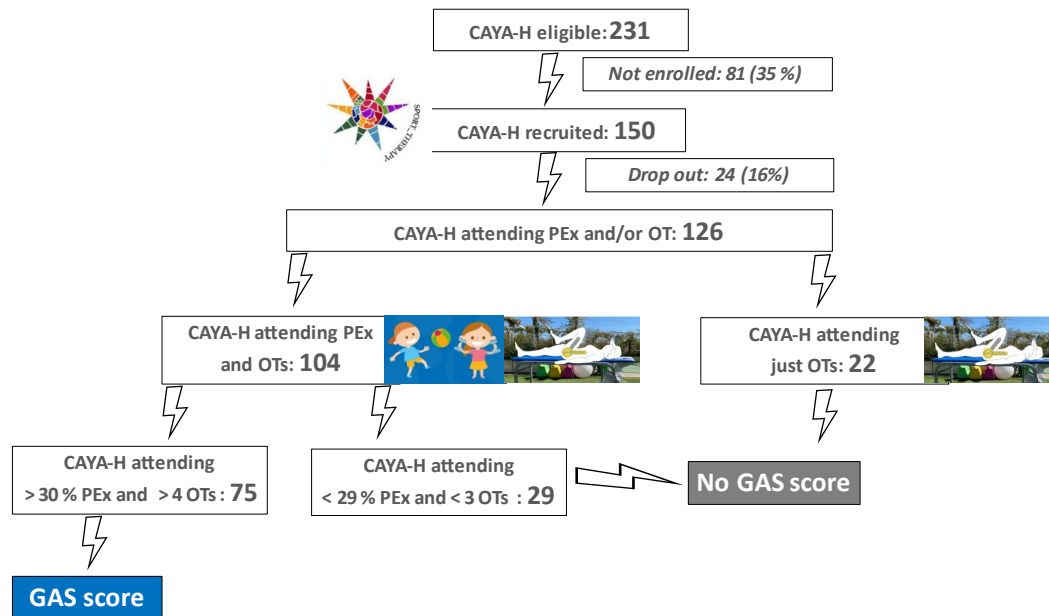

**Figure S1:** Participants’ flow chart, from the eligibility number of participants to those with a GAS score (see the methods section for further explanation). CAYA-H: Children, adolescents and young adults with hematological malignancies; PEx: precision-based exercise program; OT: osteopathic treatment. GAS: goal attainment scaling.
